# Supplementary material for: Weak ferromagnetism in chiral diamond-like neutral networks: Mn(2-pymS)2 and Co(2-pymS)2 (2-pymSH = 2-mercaptopyrimidine)
Source: Royal Society of Chemistry journal article supplement (doi:10.1039/c2dt11738j), 2012-01-01
Supplement: c2dt11738j.pdf [file c2dt11738j.pdf]

## Weak ferromagnetism in chiral diamond-like neutral networks: Mn(2-pymS)<sub>2</sub> and Co(2-pymS)<sub>2</sub> (2-pymSH = 2-mercaptopyrimidine)

Jing Zhang,<sup>abc</sup> Song Gao,<sup>\*a</sup> Xi-Xiang Zhang,<sup>d</sup> Zhe-Ming Wang<sup>a</sup> and Chi-Ming Che<sup>\*c</sup>

<sup>a</sup>Beijing National Laboratory for Molecular Sciences, State Key Laboratory of Rare Earth Materials Chemistry and Applications, College of Chemistry and Molecular Engineering, Peking University, Beijing, 100871, P. R. China. Fax: 86-10-62751708; E-mail: gaosong@pku.edu.cn;

<sup>b</sup>College of Materials Science and Optoelectronics Technology, Graduate University of Chinese Academy of Sciences, Beijing, 100049, P. R. China. Fax: 86-10-88256701; E-mail: zhangj271@gmail.com

<sup>c</sup>Department of Chemistry, The University of Hong Kong, Pokfulam Road, Hong Kong, China. Fax: +852 2857-1586; E-mail: cmche@hku.hk

<sup>d</sup>Department of Physics, The Hong Kong University of Science and Technology, Clear Water Bay, Kowloon, Hong Kong, China

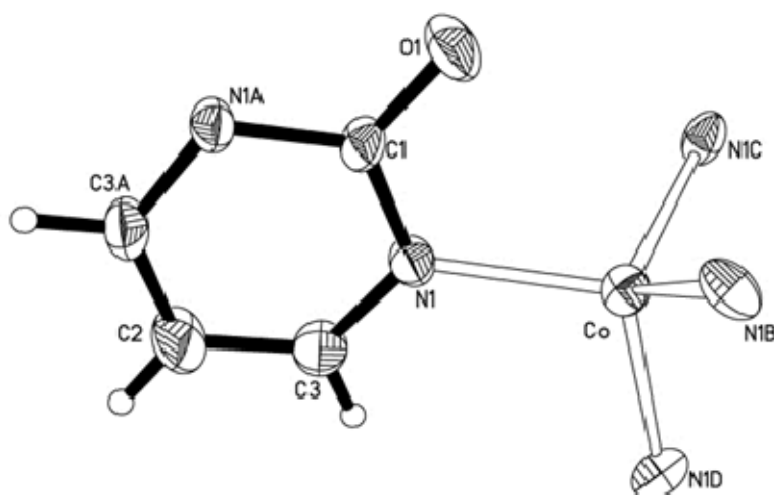

**Fig. S1** ORTEP drawing of the repeated unit of Complex **3**. Significant bond distances (Å) and angles (°): Co-N(1) 2.017(2); N(1A)-Co-N(1B) 111.47(13); N(1A)-Co-N(1) 108.48(6).

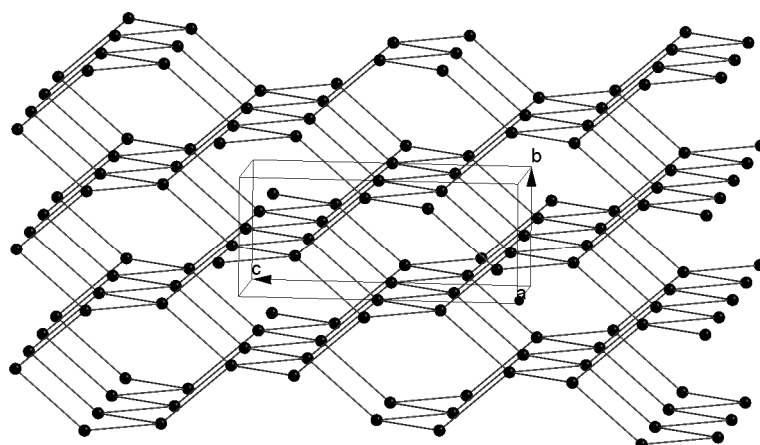

**Fig. S2** Connection of Cobalt ions in complex **3** neglecting the shape of ligands.

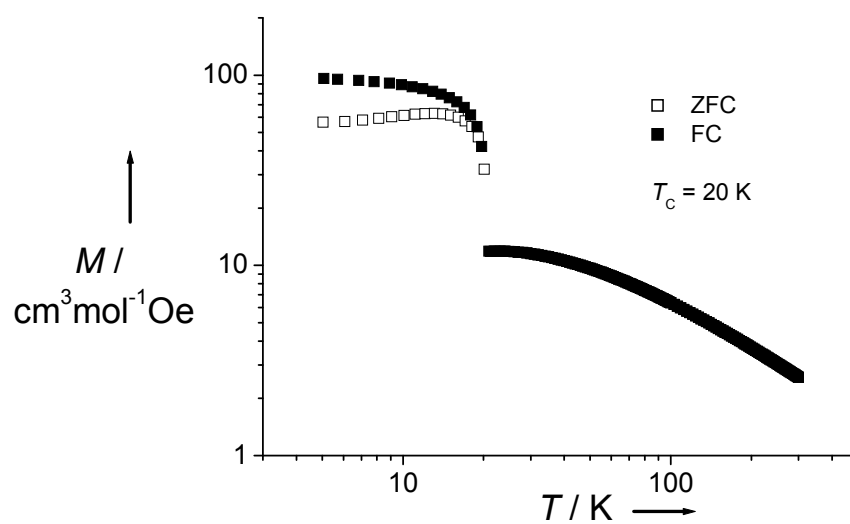

**Fig. S3** Zero-field-cooling and field-cooling magnetization of complex **1** measured with applied field of 200 Oe.

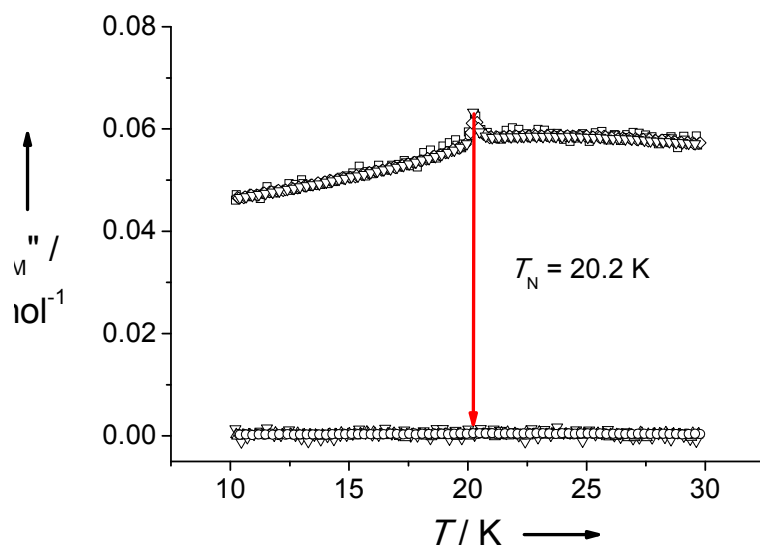

**Fig. S4** Temperature dependence of the real (top) and imaginary (bottom) components of the ac susceptibility for **1** in zero applied static field with an oscillating field 2 Oe in frequency of 111-1111 Hz.

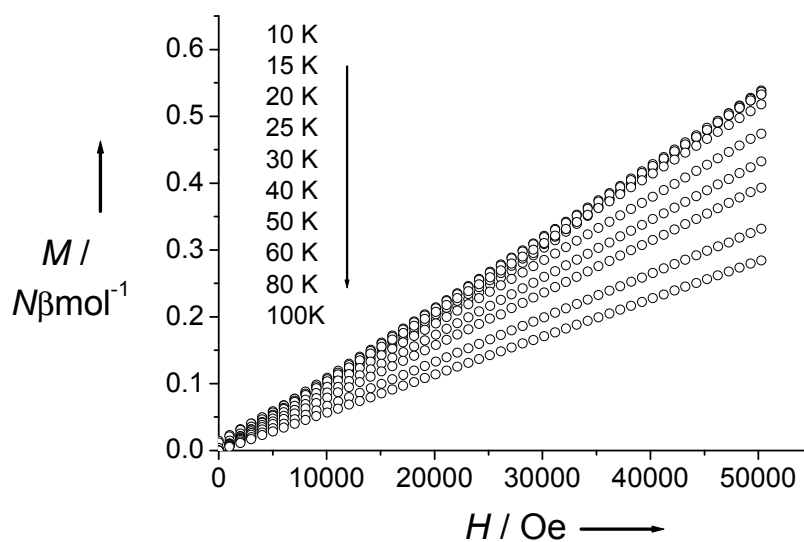

**Fig. S5** Field dependence of magnetization of **1** measured in the range of 10-100 K.

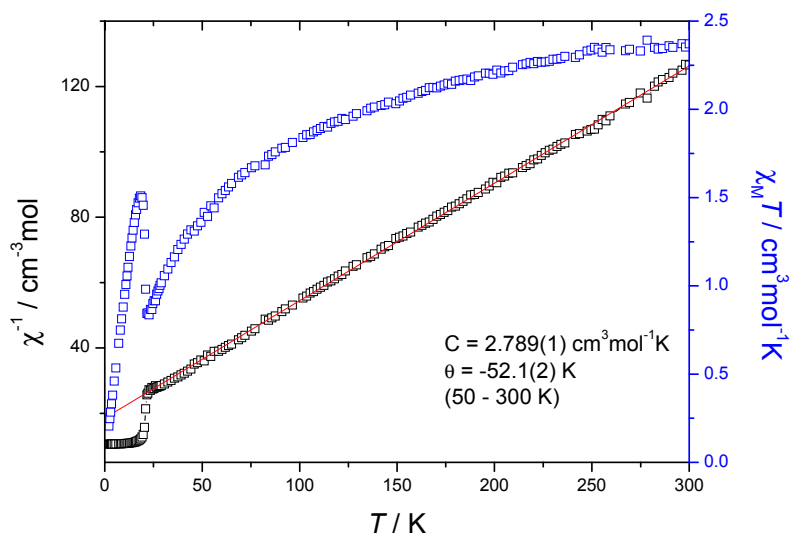

**Fig. S6** Plots of  $\chi_M^{-1}$  and  $\chi_M T$  versus  $T$  for complex **3** measured with applied field of 5kOe.

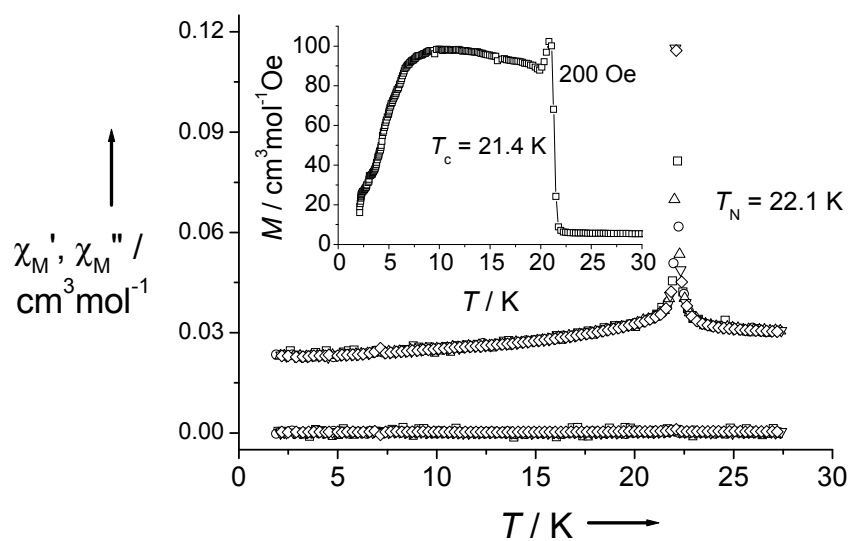

**Fig. S7** Temperature dependence of the real and imaginary components of the ac susceptibility for **3** in zero applied static field with an oscillating field 5 Oe in frequency of 111-1111 Hz. Inset: Temperature dependence of magnetization of **3** measured at 200 Oe.

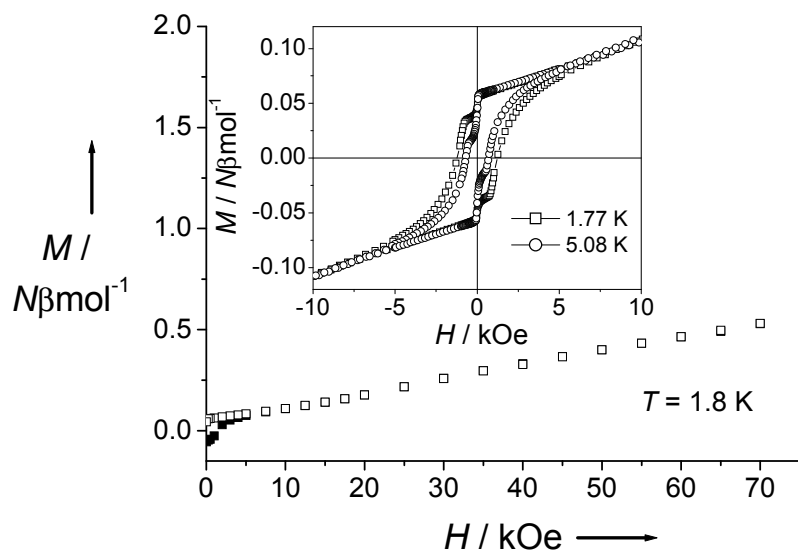

**Fig. S8** Field dependence of magnetization of **3** measured at 1.8 K and 5.08 K.
